# Supplementary material for: Ethnic differences in root resorption induced by orthodoncic forces.
Source: Research Square preprint supplement (doi:10.21203/rs.3.rs-5416132/v1), 2024-11-29
Supplement: Supplementary file 4 [file 979f7f1d2c26627cc3b14b11.xlsx]

## Sheet: Variables
CODIGO	NOMBRE	telefono	Etnia	Procedencia	SEXO	EDAD	IC	TL1	CL1	TL2	CL2	MM (FORMULA (Runo- [(Rdos x Cuno) /Cdos] )	RB	Malgrem	MORFOLOGÍA	PUNTIAGUDA	REDONDEADA	CUADRADA	CURVADA	IL	TL1	CL1	TL2	CL2	MM (FORMULA (Runo- [(Rdos x Cuno) /Cdos] )	RB	Malgrem	MORFOLOGÍA	PUNTIAGUDA	REDONDEADA	CUADRADA	CURVADA	DIENTE MEDIDO (IC o IL sup con raíz + larga al inicio, o en su defecto, raíz con + RR al final)	TL1	CL1	TL2	CL2	MM (FORMULA (Runo- [(Rdos x Cuno) /Cdos] )	RB uno SI/ dosNO	apice-perpendicular SBL inicial	apice-perpendicular SBL final	Incisal-SBL inicial	Incisal-SBL final	Diferencia VERTICAL	Diferencia SAGITAL	Proinclinación VERTICAL	Proinclinación SAGITAL	Ángulo inicial	Ángulo final
PR151	Aida Korich Sanz		0	Padre egipcio y madre española	2	12.03	11	47.5	19.6	51.7	21.6	0.587037		1	2	0	1	0	0	12	45.7	15.8	44.9	16.1	1.63665	2	1	4	0	0	0	1	12	44.9	15.8	44.2	16.8	3.33095	2	101.8	100.6	105.5	117.5	-12	1.2	2	1	122.2	112.7
PR463	Erika Belén Simeoni		0	Padres argentinos, abuelos italianos y belgas ,Fuera	1	24.02	11	83.6	41	56.6	28.4	1.88873		2	3	0	0	1	0	12	84	39	57.6	26.9	0.490706	2	2	3	0	0	1	0	21					#DIV/0!	#DIV/0!					0	0	1	1
PR546	Olivia Varela Warburton		0	Madres lesbianas. Abuelo materno chile, Padre Noruega abuela japonesa. Fuera	2	15.00	11	45.2	20.1	42.2	19.7	2.14315		1	1	1	0	0	0	12	44.7	20.2	44.5	20.2	0.2	2	0	4	0	0	0	1	21					#DIV/0!	#DIV/0!	94.1	93.5	117.2	124.3	-7.1	0.6	2	1	108.4	109.3
PR777	Nadia Albartawi Montero		0	Padre Sirio. Sacarla	2	15.03	11	83	33.6	75.4	30.7	0.477524		1	4	0	0	0	1	12	74.1	29.3	68.8	27.5	0.796727	2	1	4	0	0	0	1	11
1	Daniel Martínez Ballesteros		1	0	1	11.10	11	100	42.1	50.7	21.5	0.722326		1	2	0	1	0	0	12	83.5	34.5	41.2	17.6	2.73864	2	2	1	1	0	0	0	22	83	32.7	46.4	18	-1.29333	2	89.8	90.7	127.8	139.7	-11.9	-0.9	2	2	108.4	110.8
2	Luis Miguel Gómez Martín		1	0	1	16.11	11	102.5	43.4	51.4	21.9	0.638813		0	2	0	1	0	0	12	88.4	37.7	43.6	18.7	0.500535	2	0	2	0	1	0	0	12	85.6	34.8	43.6	17.3	-2.10405	2	69.1	69	152.4	152.2	0.2	0.1	1	1	88.9	91.6
3	Maria Corbera Pérez		1	0	2	10.04	11	84.5	38.2	43.5	19.8	0.575758		1	3	0	0	1	0	12	76.4	33.1	40.5	18	1.925	2	1	1	1	0	0	0	11	88.3	36.5	44.3	20.1	7.85473	1	82.2	71	108.2	120	-11.8	11.2	2	1	113.1	112.6
4	Paula Duque Gancedo		1	0	2	14.07	11	87	40.7	45.8	22.1	2.65339		2	3	0	0	1	0	12	78.4	38	40.5	20	1.45	2	2	2	0	1	0	0	11	86.5	39.7	46.2	22.1	3.50724	2	93.2	89.2	115.7	119.5	-3.8	4	2	1	119.1	120.8
6	Antonio Pérez Ganado		1	0	1	12.06	11	52.4	18.2	50.2	17.5	0.192		0	1	1	0	0	0	12	49.4	17.3	49.9	18	1.44056	2	1	2	0	1	0	0	12	53.6	19.5	49.8	18.9	2.21905	2	96.3	103.1	109.1	119.6	-10.5	-6.8	2	2	118.5	117.9
9	Carlota Gonzalez Pereiro		1	0	2	11.04	11	83.5	31.2	43.8	16.5	0.678182		1	2	0	1	0	0	12	76.4	26.2	37.7	13.5	3.23407	2	2	4	0	0	0	1	12	72.2	26.6	37.5	14.3	2.44476	2	76.1	72.7	94.9	106.5	-11.6	3.4	2	1	118.4	115.9
11	Enrique Rodriguez Palomo		1	0	1	12.05	11	45.5	20	42.8	19.2	0.916667		1	2	0	1	0	0	12	41.8	17.9	38.1	16.5	0.467273	2	1	2	0	1	0	0	22	42.1	16.2	38.8	15.7	2.06433	2	96.7	98.7	100.7	101.3	-0.6	-2	2	2	116.3	120.7
18	Ana Gaspar Gonzalez		1	0	2	10.3	11	88.4	36.8	45.9	19.11	0.010675		0	2	0	1	0	0	12	83.6	34.5	41.8	17.5	1.19429	2	1	4	0	0	0	1	22	83.8	31	43.2	16.5	2.63636	2	80.7	78.7	114.9	135	-20.1	2	2	1	112.3	104.3
19	Sofía Cruzado de Castro		1	0	2	11.11	11	36.1	14.2	43.4	18.7	3.14385		2	2	0	1	0	0	12	35.2	14.3	39.9	17.7	2.96441	2	2	2	0	1	0	0	21	146.02	62.79	142.11	63	4.3837	2	90.1	92.7	105.2	110.7	-5.5	-2.6	2	2	113.5	120.5
21	Raúl Zabala García		1	0	1	10.5	11	43.2	18.2	42.5	18.4	1.16196		2	2	0	1	0	0	12	36.5	13.8	38.6	15.2	1.45526	2	2	4	0	0	0	1	21	48.12	17.9	42.5	17.5	4.64857	2	85.3	83.9	109.3	123	-13.7	1.4	2	1	119.5	121.3
23	Marcos Comino Garayoa		1	0	1	9.5	11	46.3	20.3	42.5	20	3.1625		3	1	1	0	0	0	12	43.3	18.7	41.7	18.5	1.14919	2	2	1	1	0	0	0	11	46.4	16.9	42.4	17.7	5.91638	1	83.7	82.9	117.1	129.3	-12.2	0.8	2	1	104.5	114.8
PR3	Andrea Irurzu Garrido		1	0	2	14.05	11	82.9	43	41	22.1	3.12624		3	2	0	1	0	0	12	70.1	35.1	35.3	18	1.265	2	2	2	0	1	0	0	21	77.9	40.2	37.8	20.7	4.4913	2	92.5	91.2	114.8	115.3	-0.5	1.3	2	1	108.3	121.4
PR4	Susana Lázaro-Carrasco Calvo		1	0	2	12.3	11	43.6	19.8	39.5	19.3	3.07668		3	1	1	0	0	0	12	44.1	16.2	35.3	14.8	5.46081	1	4	2	0	1	0	0	12	45.1	16.8	35.7	15.6	6.65385	1	82.3	76.4	128.2	128.3	-0.1	5.9	2	1	105.5	114.7
PR6	Carlos José Fernández Sevillejas		1	0	1	12.8	11	44.8	23.1	44.1	22.8	0.119737		0	2	0	1	0	0	12	41.6	20.1	41.4	20.5	1.0078	2	0	2	0	1	0	0	12	45.5	19.4	41.4	19.1	3.44974	2	87.1	87.7	121.1	126.1	-5	-0.6	2	2	99.8	119.3
PR9	Belén Gonzalo Espinosa de los Monteros		1	0	2	12.00	11	47.7	20.2	48.4	21.1	1.36445		1	2	0	1	0	0	12	47.3	17.7	45.2	17.8	2.35393	2	2	4	0	0	0	1	12	49.5	15.4	43.1	15.2	5.83289	1	89.2	89.8	117.9	107.9	10	-0.6	1	2	107.3	124.5
PR11	Raquel Senen Carramolino		1	0	2	21	11	39.8	18.3	36.8	17	0.185882		0	1	1	0	0	0	12	38.8	15.6	36.1	15.1	1.50464	2	1	4	0	0	0	0	11	38.6	17.1	37	16.4	0.0207317	2	76.5	70	137.7	136.1	1.6	6.5	1	1	80.9	89.5
PR15	Miguel Cabezas Serna		1	0	1	12.04	11	84.9	39.6	38	18.3	2.67049		3	1	1	0	0	0	12	89.7	39	42.1	18.9	2.82698	2	3	1	1	0	0	0	11	87.1	38.5	39	17.4	0.806897	2	96.3	95.9	113.2	117	-3.8	0.4	2	1	107.2	123
PR16	Sandra Pérez Triguero		1	0	2	12.03	11	82.6	37.2	43.1	19.7	1.2132		1	1	1	0	0	0	12	76.7	36.8	37.1	18.3	2.09454	2	1	4	0	0	0	1	22	73.5	33.3	38.9	17.8	0.726404	2	100.4	102.6	86.8	88.9	-2.1	-2.2	2	2	130	130.8
PR17	Laura Pérez Triguero		1	0	2	12.01	11	75.3	35.3	39.8	18.7	0.169519		0	2	0	1	0	0	12	75.5	33.9	38.9	17.8	1.41517	2	1	4	0	0	0	1	21	72.9	31.3	38.6	18.6	7.94409	1	92.2	91.5	92.3	93.5	-1.2	0.7	2	1	126.3	131
PR23	Alejandro Nicolás Cubero		1	0	1	12.09	11	91.5	38.8	47.1	20	0.126		0	4	0	0	0	1	12	78.9	38.1	40.1	19.5	0.550769	2	0	4	0	0	0	1	22	75.6	28.02	38.5	15	3.682	2	95.3	99.5	117.6	120.3	-2.7	-4.2	2	2	126.5	128.2
PR30	Ignacio Sañoso Pérez		1	0	1	12.01	11	48.7	23	49.9	23.7	0.27384		0	1	1	0	0	0	12	48.2	19.5	44.4	19.3	3.3399	2	2	1	1	0	0	0	22	49.9	18	43.4	16.6	2.83976	2	80.7	78.4	113.8	92.5	21.3	2.3	1	1	117.9	120.7
PR31	Rodrigo Hernández Bonache		1	0	1	11.09	11	88.2	38.8	47.5	21	0.438095		0	2	0	1	0	0	12	89	39.3	40.1	18.2	2.41044	2	2	1	1	0	0	0	22	89.1	34	37.9	14.7	1.44014	2	89.3	95.9	128.9	140.5	-11.6	-6.6	2	2	118.8	109.8
PR33	María Calvo Sanz		1	0	2	14.10	11	87.7	32.2	52.3	19.2	-0.0114583		0	1	1	0	0	0	12	83.4	33.2	40	16.3	1.92761	2	2	1	1	0	0	0	12	75.7	32.3	36.1	16	2.82313	2	81	75.4	130.8	136.1	-5.3	5.6	2	1	105.1	104.1
PR35	Teresa Caturla de Miguel		1	0	2	13.6	11	87.2	38.6	49.9	22.2	0.436937		0	2	0	1	0	0	12	85.6	34.1	47.5	19	0.35	2	0	4	0	0	0	1	11	87.9	34.9	47.8	21.3	9.57981	1	74	80.8	124.6	120.6	4	-6.8	1	2	125.7	103.8
PR38	Sofía Ibiricu Macías		1	0	2	11.09	11	85.7	34	47.6	19.1	0.967016		1	2	0	1	0	0	12	89	33	43.2	16.4	2.07317	2	1	2	0	1	0	0	22	79.4	25	43.1	14.4	4.57361	2	80.5	80.7	108.7	114.9	-6.2	-0.2	2	2	110.6	112.9
PR41	Paula Rodríguez Parrondo		1	0	2	14.06	11	44.6	18.2	47	20.1	2.04279		2	2	0	1	0	0	12	40.4	17.3	38.8	18	3.10889	2	3	2	0	1	0	0	12	45.4	19.01	44.5	19.5	2.01821	2	86.9	81.3	126.8	131.7	-4.9	5.6	2	1	96	93.8
PR42	Jose Manuel Romero Fernández		1	0	1	14.01	11	46	20.4	41.2	18.3	0.0721311		0	2	0	1	0	0	12	41.2	18.3	38	17.2	0.769767	2	1	4	0	0	0	1	22	42.9	16.6	36	14.2	0.815493	2	92.9	97.6	108.2	111.6	-3.4	-4.7	2	2	119.2	123.4
PR50	Ana Rodriguez Najarro		1	0	2	14.6	11	50.2	20.9	39	16.3	0.193865		0	2	0	1	0	0	12	47	18.2	40.8	16	0.59	2	0	4	0	0	0	1	22	48.6	17.5	38.6	15.9	6.11572	1	100	88.6	102.7	105.2	-2.5	11.4	2	1	105.7	124.3
PR54	Jorge Luís Madruga Ricardo		1	0	1	14.05	11	53.1	21.9	47.1	20.1	1.78209		2	1	1	0	0	0	12	52.3	20.2	43.5	18.1	3.75304	2	3	1	1	0	0	0	12	50.7	17.7	43.6	16.7	4.48922	2	91	93.9	121.8	129.2	-7.4	-2.9	2	2	110.4	119.1
PR55	Laura Ceballos Molina		1	0	2	22.09	11	47.5	21.4	44.1	20.8	2.12788		2	2	0	1	0	0	12	46.7	21.2	41.7	19.2	0.65625	2	1	1	1	0	0	0	21	47.7	22.5	43.8	21.5	1.86279	2	99	90.6	121.1	114.8	6.3	8.4	1	1	109.3	119.4
PR56	Lucía Peña Voces		1	0	2	12.08	11	72.7	31.7	39.9	17.6	0.834659		0	4	0	0	0	1	12	66.9	28.7	36	16.2	3.12222	2	3	4	0	0	0	1	22	69.6	28.8	37.3	15.6	0.738462	2	75.6	74.3	120	120.4	-0.4	1.3	2	1	105.3	109.6
PR57	María Berrocal Renedo		1	0	2	18.04	11	81.4	36.4	43.3	19.5	0.573333		0	2	0	1	0	0	12	79.1	33.7	40.9	17.5	0.338286	2	0	2	0	1	0	0	12	78.43	27.91	40.9	15.5	4.78361	2	108.7	106.3	112.9	115.7	-2.8	2.4	2	1	122.2	117
PR59	Rubén Fernández Zaplana		1	0	1	14.05	11	55.2	24	49.7	22.9	3.11266		3	2	0	1	0	0	12	48.1	16.3	41.1	15.5	4.87871	1	4	1	1	0	0	0	12	48.93	16.1	41.5	16.1	7.43	1	100.1	98.1	122.6	125.2	-2.6	2	2	1	100.7	106.7
PR60	Miriam Vidal Herranz		1	0	2	11.04	11	40.7	18.6	38.7	18	0.71		1	2	0	1	0	0	12	40.8	15.4	36.4	14.9	3.17852	2	3	4	0	0	0	1	12	42	15.8	36.9	14.5	1.79172	2	87.2	87.5	95.1	104.3	-9.2	-0.3	2	2	115.3	113.2
PR62	Raquel Navas Díaz		1	0	2	12.09	11	42	18.8	39.7	19.2	3.12708		3	1	1	0	0	0	12	41.4	16.6	35.8	15.6	3.30513	2	3	2	0	1	0	0	22	42.4	13.2	38.9	14.5	6.98759	1	95	87.6	126.2	126.5	-0.3	7.4	2	1	100.9	115.1
PR67	Andrea Escribano Iniesta		1	0	2	15.04	11	84.5	37.5	41.8	18.8	1.12234		1	2	0	1	0	0	12	74.2	34.3	36.6	18	4.45667	1	3	2	0	1	0	0	21	83.2	31.9	40.6	16.5	4.70667	2	90	86.4	115.8	112.9	2.9	3.6	1	1	120.9	119
PR68	Elías Garcia García		1	0	1	13.03	11	55.9	23.2	48.6	21.3	2.96479		3	2	0	1	0	0	12	54.9	21	46.7	19	3.28421	2	3	2	0	1	0	0	11	55.4	20.9	48.3	21	7.33	1	94.5	83.3	127.3	141	-13.7	11.2	2	1	104.2	112.4
PR70	María Teresa Palomar de Tena		1	0	2	13.10	11	49.2	23.7	41.8	20.5	0.875122		1	2	0	1	0	0	12	46	19.1	42.6	18.2	1.29341	2	1	2	0	1	0	0	11	47.3	18.9	42.6	17.9	2.32011	2	83.5	83.6	112.6	111.8	0.8	-0.1	1	2	112.6	119.9
PR75	Laura Sanz Corral		1	0	2	11.8	11	71.6	35.6	34.4	17.6	2.01818		2	2	0	1	0	0	12	66.4	27.5	34.6	14.8	2.10946	2	2	2	0	1	0	0	11	38.1	18.2	33.8	17.9	3.73352	2	96	103.8	82.6	82	0.6	-7.8	1	2	122.3	127.3
PR76	Gabriel Llorente Dominguez		1	0	1	13.4	11	87.3	38.2	44.6	20	2.114		2	4	0	0	0	1	12	83.6	34.7	40.9	17.4	2.03506	2	2	2	0	1	0	0	12	84.02	31.8	40.7	16.2	4.12741	2	100.2	102.6	104.9	110.9	-6	-2.4	2	2	122.6	121.2
PR78	Fátima Ambite Jimenez		1	0	2	14.4	11	49.1	20.4	48	20.1	0.383582		0	2	0	1	0	0	12	43.2	18.4	45.9	19.8	0.545455	2	0	2	0	1	0	0	12	41.1	15.7	44.6	17.8	1.7618	2	78.9	71.4	144	148.8	-4.8	7.5	2	1	101.4	99.6
PR80	Sara Pasamontes Álvarez		1	0	2	13.02	11	97.2	39.2	49.3	19.9	0.0864322		0	1	1	0	0	0	12	91.6	36.4	44.9	17.9	0.294972	2	1	4	0	0	0	1	22	90.02	34.1	44.7	17.4	2.41828	2	105.8	110.5	113.9	112.1	1.8	-4.7	1	2	116.4	122.6
PR81	Adela Esteban Camargo		1	0	2	14	11	50.6	21.5	43.6	19.6	2.77347		3	1	1	0	0	0	12	49	21.3	44	19.9	1.90452	2	2	1	1	0	0	0	21	47.9	19.7	44.1	18.8	1.68883	2	98.9	90.3	110.2	109.7	0.5	8.6	1	1	104.1	125.2
PR83	Lucia Gonzalez Dos Anjos		1	0	2	13.02	11	44.3	18.1	28.8	11.8	0.123729		0	2	0	1	0	0	12	42.2	17.2	26.3	11.1	1.44685	2	2	4	0	0	0	1	12	43.8	17.1	26.1	10.3	0.468932	2	89.1	91	108.3	106	2.3	-1.9	1	2	99	108
PR85	Roberto Muñoz Calderón		1	0	1	13	11	89.8	38	46	20	2.4		2	2	0	1	0	0	12	89.8	32	46	16.8	2.18095	2	2	4	0	0	0	1	11	90.9	34.5	47.9	19.7	7.01421	1	89.1	95.4	121.6	134.5	-12.9	-6.3	2	2	118.5	117.3
PR86	Macarena Rojo Chinchilla		1	0	2	14.07	11	78.2	33.3	70.2	31.8	4.68868		4	2	0	1	0	0	12	75	29	63.5	26.1	4.44444	1	4	4	0	0	0	1	22	74.1	28.4	64.6	27.7	7.86751	1	95	90.2	110.9	114.8	-3.9	4.8	2	1	117.5	131.4
PR89	Sara Manso Bermejo		1	0	2	13.06	11	49	23.5	47.5	23.8	2.09874		2	1	1	0	0	0	12	44.8	20.8	42	20	1.12	2	1	1	1	0	0	0	11	49.1	22.02	48.3	22	0.756091	2	102.3	98.2	120.3	124.7	-4.4	4.1	2	1	110.6	117.9
PR90	Daniel Requena Lopez		1	0	1	13.03	11	89.8	40.3	45.4	21.1	3.08815		3	4	0	0	0	1	12	90	35.9	44.9	18.6	3.33817	2	3	2	0	1	0	0	21	90.7	39.2	46.1	21.4	6.25514	1	91.9	92.9	116.1	118.4	-2.3	-1	2	2	118.8	118.7
PR91	Laura Granado Mendez		1	0	2	14.09	11	84.8	41	84	41.5	1.81205		2	3	0	0	1	0	12	73.7	32.4	72.4	32.8	2.18293	2	2	2	0	1	0	0	21	84.2	33.7	82.8	33.6	1.15357	2	86.8	85.4	124.2	129.4	-5.2	1.4	2	1	113.4	112.4
PR92	Paula Ranz Isidro		1	0	2	15.09	11	55.5	23.8	45.2	19.5	0.332821		0	2	0	1	0	0	12	54.6	22	48	20.7	3.58551	2	3	4	0	0	0	1	11	49.7	22.2	46.3	20.8	0.283654	2	94.4	99.9	120.4	117.6	2.8	-5.5	1	2	127.8	128.5
PR93	Ignacio Castelao Castañeda		1	0	1	13.03	11	98.2	40.6	53	22	0.390909		0	1	1	0	0	0	12	86.4	36.1	45.2	19.4	2.29072	2	2	4	0	0	0	1	12	87.2	32.6	45.7	18.1	4.8895	2	72.1	71	149.5	155	-5.5	1.1	2	1	106.3	100.3
PR94	Beatriz Rojo Chinchilla		1	0	2	15.10	11	70.8	35.1	43.9	21.9	0.439726		0	2	0	1	0	0	12	71.7	35.2	37.9	18.8	0.738298	2	1	2	0	1	0	0	12	73.2	30.4	38.6	16.4	1.64878	2	103.6	103.5	102.1	106	-3.9	0.1	2	1	139.1	122.5
PR97	Celia Fernández Martín		1	0	2	11.01	11	83.2	39.5	40.8	19.5	0.553846		0	2	0	1	0	0	12	79.3	32.9	38	15.8	0.173418	2	0	2	0	1	0	0	11	83.4	35.9	42.1	19.2	4.68177	2	85.3	87.8	117.5	119	-1.5	-2.5	2	2	107.6	113.1
PR98	Alejandro Amate Expósito		1	0	1	11.11	11	76.5	34.5	38.6	18.9	6.03968		4	1	1	0	0	0	12	80.2	37.7	35.4	17.9	5.64246	1	4	1	1	0	0	0	21	76.9	35.5	34.7	17	4.43824	2	102.9	98.2	106.2	117.6	-11.4	4.7	2	1	118.9	121.2
PR99	Sandra Vinuesa Avendaño		1	0	2	14.06	11	89.7	37.2	50.1	21.3	2.20141		1	2	0	1	0	0	12	84.5	36	43.8	19.4	3.22165	2	3	2	0	1	0	0	12	83.9	34.6	45.9	19.9	4.09397	2	85.5	87.4	117.6	119.1	-1.5	-1.9	2	2	115.3	110.6
PR100	Arantxa Fernandez Viegas		1	0	2	16.08	11	49.7	24	42.5	21.2	1.58679		2	1	1	0	0	0	12	45.1	20.4	41.2	19	0.864211	2	1	2	0	1	0	0	12	46.2	19.8	41.4	18.8	2.59787	2	95	84	121.9	128.2	-6.3	11	2	1	113.1	114.6
PR105	Sergio Sánchez Lara		1	0	1	17.09	11	46.3	18.8	40.2	19.5	7.54308		4	2	0	1	0	0	12	48	19.2	42.7	20	7.008	1	4	2	0	1	0	0	11	46.9	19.7	39.1	20	8.3865	1	101.4	101.8	129.5	124.8	4.7	-0.4	1	2	103.5	118
PR106	Alejandro Palencia Fernández		1	0	1	14.10	11	50.9	22.5	44.5	20.6	2.29563		2	1	1	0	0	0	12	52.1	18.9	42.5	16.8	4.2875	1	3	4	0	0	0	1	21	52.4	22.1	41.7	19.4	4.89639	2	118	100.5	112.8	117.1	-4.3	17.5	2	1	105.7	123.7
PR107	Claudia Ruiz Garcés		1	0	2	13.05	11	44.1	20.5	42.2	20	0.845		1	1	1	0	0	0	12	40.2	17.4	40.3	18.2	1.67143	2	1	1	1	0	0	0	22	39.5	17.2	37.7	16.7	0.671257	2	103.2	99.9	108.1	113	-4.9	3.3	2	1	106.2	110.6
PR108	Claudia Troncoso Expósito		1	0	2	11.06	11	48.1	21.5	50.4	23.1	1.19091		1	1	1	0	0	0	12	45.6	17.2	46.9	18.2	1.27692	2	1	1	1	0	0	0	11	48.7	19.5	49.5	20.9	2.51579	2	99.6	99.5	109.6	117.6	-8	0.1	2	1	115.7	115.6
PR113	Jaime Morales Camino		1	0	1	13.01	11	48.9	19.2	46.3	18.2	0.056044		0	2	0	1	0	0	12	46.2	15.3	46.5	15.4	0.00194805	2	0	4	0	0	0	1	22	49.3	15.6	43.2	15.7	6.37516	1	94.4	100.9	123	134	-11	-6.5	2	2	119.8	111.6
PR118	Enrique Madruga Ricardo		1	0	1	12.05	11	43.5	17.5	48.1	19.8	0.987374		1	1	1	0	0	0	12	46.5	17.8	45	17.5	0.728571	2	1	1	1	0	0	0	21	46.3	19.1	47.7	20	0.7465	2	89.2	83	110.1	118.8	-8.7	6.2	2	1	119.5	124.8
PR123	Sandra de la Cruz Santos		1	0	2	12.11	11	43.3	19.8	40.8	18.7	0.1		0	2	0	1	0	0	12	36.6	16.7	35.2	16.1	0.0881988	2	0	2	0	1	0	0	12	36.4	13.9	34.3	14.4	3.29097	2	95	97.8	120.6	118.2	2.4	-2.8	1	2	108	109.3
PR126	Carlos Cordero Esteban		1	0	1	13.05	11	80.3	38.2	40.9	20.4	3.71275		3	2	0	1	0	0	12	84	34.2	39.1	16.7	3.92695	2	2	2	0	1	0	0	21	79.01	36.6	36.9	19.2	8.66938	1	82.1	84.8	116.5	127.3	-10.8	-2.7	2	2	112.8	111.5
PR128	Daniel Martín Guerra		1	0	1	13.01	11	46	22	44.4	23.5	4.43404		3	1	1	0	0	0	12	43.7	18.6	42	19.3	3.22332	2	3	1	1	0	0	0	12	43.8	16.3	40.1	18.5	8.46865	1	100.8	101.8	123.5	129.7	-6.2	-1	2	2	104.4	112.8
PR130	Beatriz Cubero Baeza		1	0	2	11.11	11	49.9	18.4	49.7	18.7	0.997326		0	1	1	0	0	0	12	43.1	16.7	37.1	16	4.37687	1	3	4	0	0	0	1	11	47.6	19.3	47	20.1	2.47065	2	81.6	80.9	126.1	130.8	-4.7	0.7	2	1	110	114.6
PR131	Iris Peso Camara		1	0	2	13.1	11	47.8	18.9	45.8	18.4	0.755435		1	2	0	1	0	0	12	43.7	16.8	44.4	17.4	0.831034	2	2	2	0	1	0	0	22	44.7	17.5	43.7	17.6	1.2483	2	101.7	91.6	104.1	114.1	-10	10.1	2	1	107.9	116.3
PR132	Antonio Candela Alvarez		1	0	1	14.08	11	44.3	18.4	40.1	17.9	3.07989		3	2	0	1	0	0	12	41.2	15.2	38.3	15.5	3.64129	2	3	4	0	0	0	1	22	45.5	17.2	37.9	17.1	7.37836	1	74.9	80.5	137.2	134.1	3.1	-5.6	1	2	109.6	118.9
PR134	Naira Sanchez Lopez-Covarrubias		1	0	2	12.11	11	46.5	18.1	46.4	18.9	2.06402		2	1	1	0	0	0	12	42.4	15.8	42.3	16.8	2.61786	2	1	4	0	0	0	1	12	43.4	16.1	42.6	17.1	3.29123	2	93.9	86	103.9	110.8	-6.9	7.9	2	1	111.8	117.7
PR136	Lucía Monge Barroso		1	0	2	11.04	11	92	36.3	49.5	19.6	0.32398		0	4	0	0	0	1	12	85.7	33.2	43.3	16.8	0.130952	2	0	1	1	0	0	0	21	87.9	35.2	47.1	19.6	3.31224	2	86.8	92.2	110.1	109.1	1	-5.4	1	2	112.3	124.8
PR137	Cecilia Sanz Pauli		1	0	2	13.8	11	49.5	19.7	59.2	23.9	0.703347		0	1	1	0	0	0	12	48.5	18.3	47.9	18.1	0.0707182	2	0	1	1	0	0	0	21	44.3	18.5	47.1	21.1	3.00379	2	108.3	109.5	106.8	108.3	-1.5	-1.2	2	2	117.8	113.3
PR139	Ana Fernández-Monasterio Galan		1	0	2	13	11	47.9	21.3	49.9	22.5	0.661333		0	2	0	1	0	0	12	42.9	18.3	44.3	19	0.232105	2	0	2	0	1	0	0	12	44.6	17.4	45.1	19.7	4.76548	2	90.7	77.5	119.3	130.4	-11.1	13.2	2	1	106.5	109.4
PR140	Alicia Sardiña Kugel		1	0	2	16.2	11	49.7	19.7	48.8	20.5	2.80439		2	4	0	0	0	1	12	47.1	18.9	44.7	19.2	3.09844	2	3	2	0	1	0	0	12	43.8	15.8	43.9	17.2	3.47326	2	86.7	90.7	144.1	144.4	-0.3	-4	2	2	109.4	108.7
PR143	Hector Lopez Cumbreras		1	0	1	10.11	11	52.6	20.4	54.2	21.3	0.690141		0	2	0	1	0	0	12	52.1	19.7	51.1	19.6	0.739286	2	0	2	0	1	0	0	21	53.3	19.4	53.9	22	5.77	1	84.9	81.7	123.2	137.6	-14.4	3.2	2	1	110.3	108.8
PR144	Manuel Pelaez Van Bockstaele		1	Madre Belga padre español	1	9.11	11	51.7	19.1	53	19.8	0.573737		0	2	0	1	0	0	12	45.5	17	48.2	18.4	0.967391	2	0	2	0	1	0	0	11	52.8	18.9	51.1	19.8	4.02273	2	74	77.9	119.5	126.4	-6.9	-3.9	2	2	102.5	107.1
PR145	María Gaspar González		1	0	2	11.05	11	85.1	31.1	44.1	16.4	1.47134		1	1	1	0	0	0	12	82.9	30	43.5	16.3	2.83865	2	2	1	1	0	0	0	21	83.4	32.9	44	17.4	0.204598	2	78.2	87.5	107.1	111.3	-4.2	-9.3	2	2	115.7	116.3
PR146	Rebeca Álvarez Marín		1	0	2	13.02	11	46.6	19.1	42.5	18	1.50278		1	4	0	0	0	1	12	40	15.8	34	14.5	2.95172	2	3	4	0	0	0	1	12	40.5	15.2	35.3	15	4.72933	2	68.7	73.1	137	138.6	-1.6	-4.4	2	2	112.6	111.7
PR147	Adrián Sanz Serrano		1	0	1	17.11	11	43.3	20.8	40.9	20.8	2.4		3	2	0	1	0	0	12	44.1	15.9	40.3	16.1	4.30062	1	3	4	0	0	0	1	12	44.3	16.8	39.9	16.5	3.67455	2	100.9	109	116.9	123.8	-6.9	-8.1	2	2	129.9	120.5
PR149	Sergio Pintado Morales		1	0	1	11.10	11	82.6	34.9	39.4	17.6	4.47159		4	1	1	0	0	0	12	76.8	28.7	30.9	12.8	7.51641	1	4	2	0	1	0	0	22	77.01	27.3	29.1	12.1	11.3546	1	77.7	83.5	137.7	140.8	-3.1	-5.8	2	2	95.1	97.5
PR154	Claudia Gutierrez Arbizu		1	0	2	22.05	11	47.7	19.5	49.4	20.2	0.0118812		0	2	0	1	0	0	12	47	15.9	44.6	15.4	0.951948	2	0	2	0	1	0	0	11	49.7	19.6	45.6	18	0.0466667	2	94.3	96.2	123	119.5	3.5	-1.9	1	2	109.7	111.3
PR155	Alfonso Diosdado Ramos		1	0	1	12.01	11	109	43	55.7	22	0.131818		0	2	0	1	0	0	12	93	36.9	49	19.5	0.276923	2	0	2	0	1	0	0	12	82.8	28.1	49.2	17.5	3.79886	2	87.7	109.3	120.3	133.6	-13.3	-21.6	2	2	122.8	121.5
PR156	Manuel García Martínez		1	0	1	12.01	11	98.4	43.8	47	21.6	3.09444		3	2	0	1	0	0	12	85.8	32.3	41.1	16.1	3.34472	2	3	4	0	0	0	1	11	98.2	43.8	45.6	21.5	5.30326	1	90.2	96.6	115.3	125.5	-10.2	-6.4	2	2	113.4	123.9
PR157	Sandra López Mejias		1	0	2	12.08	11	40.4	17.8	42.7	19.8	2.01313		2	2	0	1	0	0	12	37.7	15.8	37.9	18.8	5.84787	1	3	2	0	1	0	0	12	38.3	16.7	37.8	17.1	1.38421	2	85.2	89.3	116.6	121.5	-4.9	-4.1	2	2	114.8	106.7
PR160	Noelia Antunez Salinas		1	0	2	13.03	11	44.6	18.1	41.7	17.3	0.971676		1	1	1	0	0	0	12	42.2	17	38.2	15.7	0.836943	2	1	2	0	1	0	0	22	38.5	14.6	37.9	14.9	1.36309	2	92.7	90.3	120.1	120.7	-0.6	2.4	2	1	106.5	107.8
PR167	Javier Alba García		1	0	1	12.06	11	42.1	20.3	42.1	20.5	0.410732		0	2	0	1	0	0	12	41.7	17.6	39.8	17	0.495294	2	0	2	0	1	0	0	12	42.2	16.8	40	16.5	1.47273	2	89.5	95.3	113.9	119.3	-5.4	-5.8	2	2	111.3	107.6
PR173	María Castellanos Manzanares		1	0	2	15.00	11	41.7	20	39.4	19.2	0.658333		0	2	0	1	0	0	12	39.8	17.4	35.7	15.6	-0.0192308	2	0	1	1	0	0	0	11	42.1	15.5	43	17	2.89412	2	106.2	99.6	124.1	125.3	-1.2	6.6	2	1	95.6	104.5
PR175	Elsa Cifuentes Escudero		1	0	2	16.02	11	43.2	19.8	37.2	17.6	1.35		2	1	1	0	0	0	12	39.5	16.3	32	15.2	5.18421	1	4	1	1	0	0	0	22	39.2	16.02	30.1	14.2	5.24211	1	94.9	91.5	109.6	113.1	-3.5	3.4	2	1	110.6	108.9
PR182	Jorge Simón López		1	0	1	13.2	11	46.4	20.3	43.5	19.7	1.57513		2	4	0	0	0	1	12	43.1	17	40.7	17.4	3.33563	2	3	2	0	1	0	0	12	44.7	16.4	41.5	15.7	1.34968	2	96.8	94.4	110.2	108.9	1.3	2.4	1	1	106	122.8
PR183	Lidia Erustes Muñoz		1	0	2	19	11					#DIV/0!								12					#DIV/0!	#DIV/0!							11	45.2	17.6	38.5	16.3	3.62945	2	109.3	115.3	103.9	99.6	4.3	-6	1	2	119.4	124.1
PR186	Lucía Núñez Román		1	0	2	10.03	11					#DIV/0!								12					#DIV/0!	#DIV/0!							22	89.2	30.5	44.7	16.1	4.51988	2	82.5	85.2	106.1	116.2	-10.1	-2.7	2	2	102.2	102.2
PR187	Cristina Ocaña Nuñez		1	0	2	12.05	11					#DIV/0!								12					#DIV/0!	#DIV/0!							21	81.2	35.8	42.7	19	0.744211	2	93.8	92.6	113.1	110.5	2.6	1.2	1	1	93.2	113.9
PR190	Laura Botello Sanchez		1	0	2	12.08	11					#DIV/0!								12					#DIV/0!	#DIV/0!							12	39.8	14.5	35.2	16.5	8.86667	1	89.5	93	105.3	110.8	-5.5	-3.5	2	2	123.7	118.6
PR194	Hugo López Mejias		1	0	1	12.08	11					#DIV/0!								12					#DIV/0!	#DIV/0!							21	49.2	21.1	43.3	18.6	0.0801075	2	88.8	88.2	114.9	128.1	-13.2	0.6	2	1	120.1	121.5
PR195	David del Reino Iniesta		1	0	1	13.02	11					#DIV/0!								12					#DIV/0!	#DIV/0!							12	43.1	16.5	37.1	15.2	2.82697	2	89.5	87.5	117.2	130.4	-13.2	2	2	1	106.9	111.2
PR196	Miguel Alonso García		1	0	1	9.04	11					#DIV/0!								12					#DIV/0!	#DIV/0!							12	45.9	17.6	45.8	18	1.11778	2	100.3	108.6	109.2	115.6	-6.4	-8.3	2	2	118.7	119.1
PR197	Rosa García Molina		1	0	2	15.07	11					#DIV/0!								12					#DIV/0!	#DIV/0!							12	40.4	14.9	36.6	13.6	0.301471	2	94.3	87.6	111.3	114.1	-2.8	6.7	2	1	122.2	130.1
PR206	Noelia Mora Sanz Viveros		1	0	2	13.03	11					#DIV/0!								12					#DIV/0!	#DIV/0!							12	43.7	15.7	39.4	14.4	0.743056	2	80.6	81	122.3	123.9	-1.6	-0.4	2	2	107.6	104.7
PR207	Guillermo García Martinez		1	0	1	13.11	11					#DIV/0!								12					#DIV/0!	#DIV/0!							22	100.1	34.9	47.1	17.3	5.08324	1	97.3	96.6	132.9	145.3	-12.4	0.7	2	1	115.8	110.1
PR213	Lucía Martín García		1	0	2	11.10	11					#DIV/0!								12					#DIV/0!	#DIV/0!							12	66.1	22.24	33.9	12.5	5.78512	1	80.8	79.5	121.5	129.1	-7.6	1.3	2	1	102.3	116.1
PR217	Diego Ramirez Fuente		1	0	1	14.01	11					#DIV/0!								12					#DIV/0!	#DIV/0!							12	81.2	26.7	42.5	14.8	4.5277	2	94.9	93.2	110.3	124.6	-14.3	1.7	2	1	124.3	121.3
PR222	Desire Gomez Sanchez		1	0	2	12.11	11					#DIV/0!								12					#DIV/0!	#DIV/0!							21	80.7	35.1	41.8	18.8	2.65851	2	90.1	86.8	104.3	107.2	-2.9	3.3	2	1	110.5	120.5
PR223	Santiago Ruíz Garces		1	0	1	10.11	11					#DIV/0!								12					#DIV/0!	#DIV/0!							22	42.5	14.5	41.8	16.3	5.31595	1	99	99.3	93.2	97.7	-4.5	-0.3	2	2	123.4	123.2
PR226	Pablo Juan-Dalac Pérez		1	0	1	18.05	11					#DIV/0!								12					#DIV/0!	#DIV/0!							11	47.5	18.9	82	35.4	3.72034	2	89.6	92	137.8	140.2	-2.4	-2.4	2	2	118.8	117.2
PR229	Rafael Rojo Chinchilla		1	0	1	14.05	11					#DIV/0!								12					#DIV/0!	#DIV/0!							22	49.7	16.6	38.4	13.7	3.17153	2	96.1	93.2	102.4	125.3	-22.9	2.9	2	1	115.6	126.4
PR232	Daniel Vacas Blanco		1	0	1	13.06	11					#DIV/0!								12					#DIV/0!	#DIV/0!							11	46	20.4	38.2	17.9	2.4648	2	106.8	110.7	118.6	122.2	-3.6	-3.9	2	2	116.6	116.3
PR239	Sofía Campos Cordero		1	0	2	13.03	11					#DIV/0!								12					#DIV/0!	#DIV/0!							22	49.8	18.3	44	17.1	2.71228	2	97.7	96.5	116.7	120.6	-3.9	1.2	2	1	114.5	116.5
PR245	Pablo González Rodriguez		1	0	1	13.00	11					#DIV/0!								12					#DIV/0!	#DIV/0!							12	49.5	18.2	45.5	18.1	3.74862	2	98.5	97.8	114.3	118.9	-4.6	0.7	2	1	119	134
PR246	Guillermo Mate Cabello		1	0	1	13.02	11					#DIV/0!								12					#DIV/0!	#DIV/0!							11	50.7	18.8	43.5	18	5.26667	1	86.5	91.4	123.9	125	-1.1	-4.9	2	2	113.1	121.1
PR250	Andrea Alonso Ortiz		1	0	2	11.11	11					#DIV/0!								12					#DIV/0!	#DIV/0!							11	36.4	17.9	32.7	16.4	0.709146	2	78.8	94.3	90.6	98.1	-7.5	-15.5	2	2	124.8	120.7
PR251	Adrián Coto Coengo		1	0	1	11.7	11					#DIV/0!								12					#DIV/0!	#DIV/0!							11	94.5	37.5	46	19	3.71053	2	104.8	112.7	116.6	124.3	-7.7	-7.9	2	2	109.3	119.1
PR262	Natalia Medio Torrubiano		1	0	2	10.01	11					#DIV/0!								12					#DIV/0!	#DIV/0!							22	38.1	15.4	40.8	16.9	0.921302	2	91.4	96.8	107	105.4	1.6	-5.4	1	2	106.5	119.1
PR264	Raúl Moreno Villegas		1	0	1	42	11					#DIV/0!								12					#DIV/0!	#DIV/0!							12	42	16.4	39.1	16.6	3.37108	2	89.8	87.7	130.2	134.3	-4.1	2.1	2	1	114.5	118.3
PR269	Alberto Fernández Lozano		1	0	1	11.11	11					#DIV/0!								12					#DIV/0!	#DIV/0!							11	90.8	33.5	85.1	31.9	1.43166	2	81.1	79.8	127.6	130.7	-3.1	1.3	2	1	106.3	108.1
PR271	Carlos García Pinto		1	0	1	14	11					#DIV/0!								12					#DIV/0!	#DIV/0!							11	48.6	20.9	37.7	18.5	6.00919	1	87	86.8	101.7	110.5	-8.8	0.2	2	1	113.2	119.9
PR277	Carlos Monzon Maroto		1	0	1	16.03	11					#DIV/0!								12					#DIV/0!	#DIV/0!							22	179.73	70.93	154.06	62.2	4.04711	2	110.9	111	103.2	111.5	-8.3	-0.1	2	2	126.3	123.3
PR278	Lidia Moreno Morales		1	0	2	13.04	11					#DIV/0!								12					#DIV/0!	#DIV/0!							22	48.8	17.8	45.4	18	3.90444	2	88.7	78.9	123.3	129.9	-6.6	9.8	2	1	95.9	106.7
PR280	Oscar Rodriguez Martínez		1	0	1	11.02	11					#DIV/0!								12					#DIV/0!	#DIV/0!							21	47.5	17.6	41.8	16	1.52	2	65.5	61.3	133.1	142.7	-9.6	4.2	2	1	92.2	96.1
PR296	Lucía Moreno Langa		1	0	2	12.05	11					#DIV/0!								12					#DIV/0!	#DIV/0!							22	37.8	13	75.8	26.4	0.474242	2	78.5	78.6	118.2	128.6	-10.4	-0.1	2	2	112.7	112.9
PR299	Atenea Nevado García		1	0	2	13.01	11					#DIV/0!								12					#DIV/0!	#DIV/0!							22	42.9	16.1	68.5	30.2	6.38179	1	89.8	91.1	116	114.3	1.7	-1.3	1	2	106.3	117.7
PR300	Carmen Franco Quiroga		1	0	2	10.09	11					#DIV/0!								12					#DIV/0!	#DIV/0!							12	37.7	13.2	39.4	15.2	3.48421	2	90.2	88.7	107.4	114.3	-6.9	1.5	2	1	107.3	112
PR301	Ines Chamorro Rubio		1	0	2	13.04	11					#DIV/0!								12					#DIV/0!	#DIV/0!							22	42.6	16.9	64.9	29.5	5.42	1	86	75.2	117.3	111.8	5.5	10.8	1	1	113.8	114.2
PR302	Juan Andrés Rodriguez Huetos		1	0	1	13.06	11					#DIV/0!								12					#DIV/0!	#DIV/0!							22	46.7	18.6	44.6	18.4	1.61522	2	80.5	79.7	132.4	136.6	-4.2	0.8	2	1	105.2	113.9
PR304	Laura Alcántara Heras		1	0	2	23.04	11					#DIV/0!								12					#DIV/0!	#DIV/0!							21	48.4	18.1	82	31.1	0.676527	2	86.2	87.1	124.2	127.7	-3.5	-0.9	2	2	114.9	105.8
PR309	Raquel López Ramirez		1	0	2	13.3	11					#DIV/0!								12					#DIV/0!	#DIV/0!							11	88.5	35.5	85.6	34.5	0.418841	2	75.2	81.4	129.5	131.3	-1.8	-6.2	2	2	111.8	110.3
PR311	Daniel Valencia Morales		1	0	1	14.10	11					#DIV/0!								12					#DIV/0!	#DIV/0!							12	45.2	18.1	78.8	33.5	2.62448	2	107.9	111.2	132.4	128.1	4.3	-3.3	1	2	107.3	111.6
PR313	Aaron Sanchez Martínez		1	0	1	14.04	11					#DIV/0!								12					#DIV/0!	#DIV/0!							21	46.8	19	85.8	35.7	1.13613	2	90.2	95.2	127.6	135.2	-7.6	-5	2	2	111.7	107.5
PR314	Marcos Fernández Montero		1	0	1	12.11	11					#DIV/0!								12					#DIV/0!	#DIV/0!							22	44.5	16.2	40.3	16.4	4.69146	2	87.8	87.4	132.9	138.3	-5.4	0.4	2	1	93.8	98.5
PR327	Alba Rubio Zazo		1	0	2	14.3	11					#DIV/0!								12					#DIV/0!	#DIV/0!							22	38.9	15.6	35.4	15.9	4.16792	2	95.6	94.6	117.9	119.7	-1.8	1	2	1	119.2	116.5
PR328	Marta Becerra Jimenez		1	0	2	14	11					#DIV/0!								12					#DIV/0!	#DIV/0!							22	46.6	17.6	40.2	18	7.29333	1	89.6	85.1	132.5	133.1	-0.6	4.5	2	1	102.1	113.1
PR335	Marcos Calvo Sanchez		1	0	1	11.02	11					#DIV/0!								12					#DIV/0!	#DIV/0!							11	87.8	28.8	41	14.2	4.64507	2	70.1	79.3	126.3	129.1	-2.8	-9.2	2	2	104.2	129
PR342	Diego Navarro Mora		1	0	1	13.00	11					#DIV/0!								12					#DIV/0!	#DIV/0!							12	47.2	17.9	89.7	34.9	1.19341	2	86.3	89.5	110.5	116.4	-5.9	-3.2	2	2	115.5	111
PR343	Christian Moreno Diaz		1	0	1	13.05	11					#DIV/0!								12					#DIV/0!	#DIV/0!							11	52.6	20.6	49.6	19.7	0.73401	2	99	100.3	117.9	121.3	-3.4	-1.3	2	2	119.5	126.2
PR347	Aitor Maine Tercero		1	0	1	13.02	11					#DIV/0!								12					#DIV/0!	#DIV/0!							22	50	17.5	88.9	32.3	1.83437	2	84.8	88.5	139.1	136.5	2.6	-3.7	1	2	105.7	115.3
PR348	Jorge Fafila Castejon		1	0	1	10.01	11					#DIV/0!								12					#DIV/0!	#DIV/0!							21	47	20.5	45.7	20	0.1575	2	114.7	118.7	98	93.8	4.2	-4	1	2	132.8	126.1
PR380	Lucía Villacieros Díez		1	0	2	14.09	11					#DIV/0!								12					#DIV/0!	#DIV/0!							12	44.3	16	41.2	15.2	0.931579	2	97	98.7	124.2	118.9	5.3	-1.7	1	2	112	123.8
PR389	Beatriz Gómez González		1	0	2	16.08	11					#DIV/0!								12					#DIV/0!	#DIV/0!							21	40.4	21.3	39.9	21.6	1.05417	2	100.8	92.9	112	120.8	-8.8	7.9	2	1	119	119.9
PR393	Cesar García Vidriales		1	0	1	11.11	11					#DIV/0!								12					#DIV/0!	#DIV/0!							11	51.7	22.4	54	23.5	0.22766	2	84.3	86.3	129.2	132.5	-3.3	-2	2	2	111.7	112.7
PR395	Patricia del Rio Miciano		1	0	2	13.03	11					#DIV/0!								12					#DIV/0!	#DIV/0!							22	38.5	14.3	38.2	15	2.08267	2	91.4	90.9	121.1	118.9	2.2	0.5	1	1	88.4	108.9
PR399	Sergio Ramirez Gómez		1	0	1	11.09	11					#DIV/0!								12					#DIV/0!	#DIV/0!							21	49.2	22.4	46.2	23	4.20522	2	91.2	81.7	118.7	137.3	-18.6	9.5	2	1	108.1	108.5
PR400	Paola García Molina		1	0	2	11.00	11					#DIV/0!								12					#DIV/0!	#DIV/0!							22	41.8	16.5	42.9	17	0.161765	2	83.9	84.8	115.8	119.1	-3.3	-0.9	2	2	107.8	114.4
PR402	María Araceli Arce Arnaez		1	0	2	56.06	11					#DIV/0!								12					#DIV/0!	#DIV/0!							11	82.1	28	41.3	14.5	2.34828	2	100.8	94.8	106.5	113.4	-6.9	6	2	1	128.6	121
PR403	Lucía Garrote Moreno		1	0	2	12.08	11					#DIV/0!								12					#DIV/0!	#DIV/0!							11	80.6	35.8	44.9	20.7	2.94686	2	95.3	92.6	104.8	109	-4.2	2.7	2	1	113.4	124.7
PR404	Sara Bermejo Cañas		1	0	2	12.03	11					#DIV/0!								12					#DIV/0!	#DIV/0!							21	51	21.4	48.6	22.1	3.93937	2	81.4	82	131.5	153.3	-21.8	-0.6	2	2	102.2	108.8
PR407	Isabel Patiño Martín		1	0	2	12.01	11					#DIV/0!								12					#DIV/0!	#DIV/0!							12	43.5	17.2	38.9	16.3	2.45215	2	102.4	97.1	100.4	99.9	0.5	5.3	1	1	111.2	127.4
PR409	Sofía Ayuso Casado		1	0	2	21.02	11					#DIV/0!								12					#DIV/0!	#DIV/0!							22	37.9	14.5	39.9	15.6	0.813462	2	70.6	75.6	121.6	123.4	-1.8	-5	2	2	108.8	105.8
PR449	Ainhoa Donoso Espasandin		1	0	2	12.00	11					#DIV/0!								12					#DIV/0!	#DIV/0!							12					#DIV/0!	#DIV/0!					0	0	1	1
PR453	Javier Durbán Martínez		1	0	1	21.04	11					#DIV/0!								12					#DIV/0!	#DIV/0!							12					#DIV/0!	#DIV/0!					0	0	1	1
PR588	Miguel Maqueda Hidalgo		1	0	1	11.08	11					#DIV/0!								12					#DIV/0!	#DIV/0!							12					#DIV/0!	#DIV/0!							1	1
PR117	Ainhoa Navas de Paz		1	0	2	11.11	11					#DIV/0!								12					#DIV/0!	#DIV/0!							12	38.7	14.7	35.8	14.3	1.8986	2	89.7	88.9	103.8	108	-4.2	0.8	2	1	122.6	129.3
PR129	Alejandro García de Pedro		1	0	1	12.11	11					#DIV/0!								12					#DIV/0!	#DIV/0!							22	39.4	16.7	37.9	17.1	2.38655	2	91.9	93.5	112.4	119.8	-7.4	-1.6	2	2	124.6	123
PR188	Mara García Mejías		1	0	2	08.05	11					#DIV/0!								12					#DIV/0!	#DIV/0!							21	47.2	19.2	47.4	19.7	1.00305	2	78.6	78.6	105	119.9	-14.9	0	2	1	106.5	110.4
PR215	Nerea Pérez Santamaría		1	0	2	13.08	11					#DIV/0!								12					#DIV/0!	#DIV/0!							21	41.4	17.3	36.8	15.4	0.0597403	2	81.1	71.3	106.2	108.8	-2.6	9.8	2	1	112.8	121.1
PR221	Sandra Molina Diaz de Mendivi		1	0	2	15.09	11					#DIV/0!								12					#DIV/0!	#DIV/0!							12	44.3	17.8	33.8	15	4.19067	2	108.7	120.5	121	-0.5	121.5	-11.8	1	2	112.7	76
PR287	Iker Vidal Esteo		1	0	1	12.7	11					#DIV/0!								12					#DIV/0!	#DIV/0!							11	88.1	31.5	43.3	17.2	8.80058	1	111.9	116.6	83.4	98	-14.6	-4.7	2	2	131.9	129.5
PR171	Rocío Escoin Gongora		1	0	2	14.05	11					#DIV/0!								12					#DIV/0!	#DIV/0!							22	43.4	16.1	44.7	18.1	3.63923	2	96	101.1	112.1	111.3	0.8	-5.1	1	2	116.4	123.7
PR555	Nuria Dusuki Yerovi		2	Egipcio y Latino. Para eliminar	2	14.06	11	50.7	20.5	47.5	19.4	0.506701		1	3	0	0	1	0	12	44	17.9	40.2	17	1.67176	2	2	1	1	0	0	0	22					#DIV/0!	#DIV/0!	106.6	101.4	116.5	117.7	-1.2	5.2	2	1	117.3	123.9
15	Ignacio Pontesta Contreras		2	Venenzuela	1	12.05	11					#DIV/0!								12					#DIV/0!	#DIV/0!							11	88.2	40	45.5	21.7	4.32903	2	99.1	104.8	135.3	140.2	-4.9	-5.7	2	2	112.5	107.8
PR69	María Camila Peña Zuasnabar		2	Peru	2	14	11					#DIV/0!								12					#DIV/0!	#DIV/0!							11	43.7	16.9	40.9	17.3	3.74566	2	110.4	111.9	111.9	108.9	3	-1.5	1	2	120.1	123
PR87	Lucas Olmos Pérez-Román		2	Padre español madre Argentina	1	12.04	11					#DIV/0!								12					#DIV/0!	#DIV/0!							11	83.5	39.3	40.1	20.5	6.62537	1	79.5	87.6	141.4	146.6	-5.2	-8.1	2	2	107.4	107.5
PR95	Andrea Gonzalez Villacorta		2	Padre Chileno Madre Peruana	2	14.01	11					#DIV/0!								12					#DIV/0!	#DIV/0!							22	43.2	16.5	39.7	15.6	1.20962	2	93.5	89.6	122.6	128.6	-6	3.9	2	1	112.9	118.7
PR103	Sara Lopez Lopez		2	Ecuador	2	11.5	11					#DIV/0!								12					#DIV/0!	#DIV/0!							21	47.7	21.6	33.5	17	5.13529	1	72.3	72.8	121.2	130.7	-9.5	-0.5	2	2	105.1	104.9
PR142	Erick Alexander Medina Jimenez		2	Republica Dominicana	1		11					#DIV/0!								12					#DIV/0!	#DIV/0!							12	84.6	33.5	37.3	16	6.50312	1	90.2	94.6	125.8	128.1	-2.3	-4.4	2	2	116.9	118.2
PR148	Isabel Victoria Pontesta Contreras		2	Venezuela	2	13.04	11					#DIV/0!								12					#DIV/0!	#DIV/0!							11	50.2	21.8	44.5	19.7	0.956345	2	92.2	83.1	127.1	134.3	-7.2	9.1	2	1	103.2	116.3
PR177	Estefany Ocaña Jímenez		2	Padre Argentina y madre Dominicana	2	16.02	11					#DIV/0!								12					#DIV/0!	#DIV/0!							21	65.9	31.6	38.1	19.6	4.47347	2	74.6	75.2	128.3	128	0.3	-0.6	1	2	109.4	106.3
PR202	Alvaro Rebollo Peña		2	Padre español, madre cubana	1	10.06	11					#DIV/0!								12					#DIV/0!	#DIV/0!							11	48.4	17.4	47.2	17.8	2.26067	2	79.6	90.1	111.2	119.8	-8.6	-10.5	2	2	128.3	118.9
PR266	Jairo Auca Flores		2	Bolivia	1	13.02	11					#DIV/0!								12					#DIV/0!	#DIV/0!							22	47.9	19.6	81.4	34.4	1.52093	2	62.6	67.3	134	141	-7	-4.7	2	2	102.1	106.1
PR281	Fernando Omar Rodriguez Meza		2	Peruano	1	11.05	11					#DIV/0!								12					#DIV/0!	#DIV/0!							21	49.1	20.1	43.1	18.1	1.23757	2	80.1	87	129.6	140.5	-10.9	-6.9	2	2	112.7	117.7
PR382	Aitana Scarlett Hidalgo Velasquez		2	Ecuador	2	11.04	11					#DIV/0!								12					#DIV/0!	#DIV/0!							21	36.2	18.2	38.2	20.3	1.95172	2	99	96.2	97.4	105.7	-8.3	2.8	2	1	133.2	127.7
PR410	Alberto Rubio de León		2	Madre Republica Dominicana, Padre español	1	12.02	11					#DIV/0!								12					#DIV/0!	#DIV/0!							11	49.9	19.1	50.6	19.6	0.590816	2	99.3	103.3	123.2	131.2	-8	-4	2	2	112.8	107.2
PR456	Ivonne Zulema Moreno Jimenez		2	Ecuador	2	33.03	11					#DIV/0!								12					#DIV/0!	#DIV/0!							11					#DIV/0!	#DIV/0!					0	0	1	1
PR485	Alba Rodriguez Martín		2	Abuela venenzolana	2	13.10	11					#DIV/0!								12					#DIV/0!	#DIV/0!							11					#DIV/0!	#DIV/0!					0	0	1	1
PR489	Hernan Darío Herrera Henao	672548812	2	Latino	1	37.9	11					#DIV/0!								12					#DIV/0!	#DIV/0!							22	40	14.9	34.7	13	0.228462	2	111.8	107.1	115.9	126.4	-10.5	4.7	2	1	115.8	116.2
PR499	Mariana Avalos Vasques		2	Padre mexicano y madre venenzolana	2	13.09	11					#DIV/0!								12					#DIV/0!	#DIV/0!							12					#DIV/0!	#DIV/0!					0	0	1	1
PR534	Mauricio Leonardo Peña Zuasnabar		2	Padres Peruanos	2	12.02	11					#DIV/0!								12					#DIV/0!	#DIV/0!							22	74.2	29	34.8	14.1	2.62553	2	87.8	88.1	109.4	123.5	-14.1	-0.3	2	2	118.5	128.5
PR589	Nour Achahbar Buele		2	Padre Marruecos y Madre Ecuador	2	11.07	11					#DIV/0!								12					#DIV/0!	#DIV/0!							12					#DIV/0!	#DIV/0!							1	1
PR591	Yaizeth Lalangui Fernández		2	Ecuador	2	20.08	11					#DIV/0!								12					#DIV/0!	#DIV/0!							11					#DIV/0!	#DIV/0!							1	1
PR600	Fiorella Huamani Ames		2	Madre y padre peruanos	2	12.04	11					#DIV/0!								12					#DIV/0!	#DIV/0!							12					#DIV/0!	#DIV/0!							1	1
PR626	Clarisa Lourdes Morate Purizaca		2	Padre español, madre Peruana	2	17.03	11					#DIV/0!								12					#DIV/0!	#DIV/0!							12					#DIV/0!	#DIV/0!							1	1
PR732	Luis Eduardo Vera Martínez		2	Padre colombiano, madre española	1	13.06	11					#DIV/0!								12					#DIV/0!	#DIV/0!							11
PR759	Moira Andrea Manzano Puñal		2	Bolivia	2	12.07	11					#DIV/0!								12					#DIV/0!	#DIV/0!							21
PR763	Adrián Alexander Gualotuña Pilatuña		2	Ecuador	1	13.09	11					#DIV/0!								12					#DIV/0!	#DIV/0!							21
PR787	Jose Manuel Gutiérrez Ruesta		2	Peruano	1	15.04	11					#DIV/0!								12					#DIV/0!	#DIV/0!							12
PR790	Diego Hernández Bousquet		2	Padre Nicaragua madre española, abuelo cubano, abuelos nicaranguensen	1	13.05	11					#DIV/0!								12					#DIV/0!	#DIV/0!							12
PR806	Lilian Elisabeth Castro Baque		2	Ecuador	2	34.04	11					#DIV/0!								12					#DIV/0!	#DIV/0!							22
PR811	Mateo Sagastegui Ruíz		2	Padre peruano y madre española	1	12.04	11					#DIV/0!								12					#DIV/0!	#DIV/0!							11
PR817	David Fernando Zarate Ysla	699744955	2	Latino	1	11.01	11					#DIV/0!								12					#DIV/0!	#DIV/0!							12
12	Daniel Moyano Fajardo		2	Madre Dominicana Padre Español	1	13.05	11					#DIV/0!								12					#DIV/0!	#DIV/0!							22	71.1	38.4	30.9	17.8	4.43933	2	79.8	61.9	144.7	160.4	-15.7	17.9	2	1	99.5	94.4
PR114	Leidy Alejandra Labega De Lo Santos		2	Dominicana	2	15.01	11					#DIV/0!								12					#DIV/0!	#DIV/0!							22	78.4	30.1	45.5	18.3	3.5612	2	97.3	98.7	117.1	115.3	1.8	-1.4	1	2	129.5	119
PR255	Juan Martín Múñoz Chaffo		2	Peruano	1	11.02	11					#DIV/0!								12					#DIV/0!	#DIV/0!							21					#DIV/0!	#DIV/0!					0	0	1	1
PR292	Angie Contreras Silvestre		2	Ecuador	2	13.02	11					#DIV/0!								12					#DIV/0!	#DIV/0!							21					#DIV/0!	#DIV/0!					0	0	1	1
PR198	Jordi Troya Montenegro		2	Ecuador	1	16.02	11					#DIV/0!								12					#DIV/0!	#DIV/0!							22	37.4	14.1	43.7	16.7	0.503593	2	96.6	96	118	113	5	0.6	1	1	118.4	129.7
PR769	Gabriel Mostaza Prendez		2	Madre chilena padre español	1	10.06	11					#DIV/0!								12					#DIV/0!	#DIV/0!							21
PR774	Celeste Fernández Céspedes		2	Madre Perú y padre español	2	12.10	11					#DIV/0!								12					#DIV/0!	#DIV/0!							12
PR782	Mario Morejón Isidro		2	Padre cubano madre española	1	11.04	11					#DIV/0!								12					#DIV/0!	#DIV/0!							11
PR319	Sofía Anna Papish Lushchak		3	Ucranianos	2	9.11	11					#DIV/0!								12					#DIV/0!	#DIV/0!							22	48.8	17.5	47.4	17.9	2.45922	2	89.4	89.2	115.6	124.5	-8.9	0.2	2	1	112.7	118.9
PR729	Elena Valiente Snejina		3	Madre Rusa. Padre Español	2	16.03	11					#DIV/0!								12					#DIV/0!	#DIV/0!							22
PR339	Alicia Andone Brunete		3	Padre rumano y madre española	2	9.11	11					#DIV/0!								12					#DIV/0!	#DIV/0!							11	80.9	31.4	42	18.2	8.43846	1	77.5	82.2	114.5	118	-3.5	-4.7	2	2	106	113.4
PR20	Adem Suko Rubio		3	Madre española padre Bosnia	1	15.06	11					#DIV/0!								12					#DIV/0!	#DIV/0!							21	86.9	36.7	45.8	21.6	9.08241	1	99.8	94.4	117.3	117.4	-0.1	5.4	2	1	113.5	121.3
PR73	Andrei Iulian Toader		3	Rumania	1	12	11					#DIV/0!								12					#DIV/0!	#DIV/0!							22	75.9	29.1	42.3	17.3	4.74798	2	79.2	78.6	128.2	141.2	-13	0.6	2	1	103.5	110.6
PR84	Filip Gabriel Preda		3	Rumania	1	13.03	11					#DIV/0!								12					#DIV/0!	#DIV/0!							21	102.3	37.9	50.9	19.3	2.34611	2	81.5	82.9	125.2	138	-12.8	-1.4	2	2	111.2	108.9
PR199	Lavinia Dumitrascu		3	Rumanía	2	17.11	11					#DIV/0!								12					#DIV/0!	#DIV/0!							11	40.9	17.2	39.6	18.2	3.47582	2	84.4	85.6	107.1	103.9	3.2	-1.2	1	2	121.3	129.1
PR405	Andrea Alexandra Marín		3	Rumanos	2	12.07	11					#DIV/0!								12					#DIV/0!	#DIV/0!							21	42.8	14.9	43	16	2.75625	2	92.7	102	119.3	117.1	2.2	-9.3	1	2	120.6	116.7
PR421	Maria Yurystovska		3	Ucranianos	2	13.03	11					#DIV/0!								12					#DIV/0!	#DIV/0!							22					#DIV/0!	#DIV/0!					0	0	1	1
PR451	Miguel Igor Rybiy		3	Ucranianos	1	11.08	11					#DIV/0!								12					#DIV/0!	#DIV/0!							22					#DIV/0!	#DIV/0!	89.3	83.7	113.2	129.5	-16.3	5.6	2	1	113.9	114.2
PR531	Monika Buchkovska		3	Ucranianos	2	11.02	11					#DIV/0!								12					#DIV/0!	#DIV/0!							12	44.3	20.3	40.1	18.5	0.298378	2	95.2	100.7	107.8	107.4	0.4	-5.5	1	2	118.7	132
PR548	Kalim Kalinov		3	Bulgaria	1	12.06	11					#DIV/0!								12					#DIV/0!	#DIV/0!							11					#DIV/0!	#DIV/0!	103.3	106.8	105	103.5	1.5	-3.5	1	2	130.3	133.5
PR727	Nicolás Romero Acuña		3	Bulgaria	1	11.05	11					#DIV/0!								12					#DIV/0!	#DIV/0!							12
PR789	Valeria Tarnavskala Fernández		3	Padre ucraniano madre española	2	11.08	11					#DIV/0!								12					#DIV/0!	#DIV/0!							11
PR224	Valeria del Pilar Blas Torio		3	Rumania	2	15.00	11					#DIV/0!								12					#DIV/0!	#DIV/0!							11	47.3	20.6	41.1	19.2	3.20312	2	99.9	101.2	117.5	116.7	0.8	-1.3	1	2	105.8	120
PR236	Naomi Dumitrascu		3	Rumania	2	11.05	11					#DIV/0!								12					#DIV/0!	#DIV/0!							21	52.8	20.3	52.8	20.5	0.515122	2	95.8	94.3	108.4	117.4	-9	1.5	2	1	106.6	114.8
PR47	Imane Ziani Echchahid		4	Negra. Marruecos	2	14.06	11					#DIV/0!								12					#DIV/0!	#DIV/0!							11	94.3	37.1	49.8	20.4	3.73235	2	97.4	100.1	107.5	111.1	-3.6	-2.7	2	2	125.7	112
PR228	Sara Pallol Karachtif		4	Madre marroquí, padre español	2	21.02	11					#DIV/0!								12					#DIV/0!	#DIV/0!							22	46.8	16.8	42.4	16	2.28	2	85.6	87.6	124	125.1	-1.1	-2	2	2	113.4	110.2
PR640	Ihsan Filali Baba Lovartiti (M3-34 ALEXANDRA)		4	Marruecos	2	20.04	11					#DIV/0!								12					#DIV/0!	#DIV/0!							22					#DIV/0!	#DIV/0!							1	1
PR747	Maryam Serroukh Belhaj		4	Marruecos	2	14.11	11					#DIV/0!								12					#DIV/0!	#DIV/0!							11
PR401	Sara Taachi Rivero		4	Padre Marruecos y madre española	2	11.08	11					#DIV/0!								12					#DIV/0!	#DIV/0!							11					#DIV/0!	#DIV/0!					0
PR179	Ismael Felicio Ramos		5	Negra. Africa. Padre Angola y madre española	1	11.01	11					#DIV/0!								12					#DIV/0!	#DIV/0!							22	41.8	14.3	43.5	14.9	0.0516779	2	87.6	86.3	115.8	130	-14.2	1.3	2	1	105.9	112.1
PR652	Temitope Sara Asekun		5	negra. Nigeria	2	30.11	11					#DIV/0!								12					#DIV/0!	#DIV/0!							22					#DIV/0!	#DIV/0!							1	1
PR713	Aissatou Marina Barry Vinueza		5	Negra. Madre Ecuador padre Guinea Conakri (Africa)	1	15.04	11					#DIV/0!								12					#DIV/0!	#DIV/0!							22
PR201	Ismael Salem Ould García		5	Madre española y padre Mauritano (africa)	1	16.08	11					#DIV/0!								12					#DIV/0!	#DIV/0!							22	85.4	28.7	41	14.1	1.9461	2	101.8	104.4	149.6	142.8	6.8	-2.6	1	2	115.8	129.9
PR351	Ainhoa Concha Rodriguez		6	Filipinos	2	13.04	11					#DIV/0!								12					#DIV/0!	#DIV/0!							12	69	35.1	35.1	17.9	0.172626	2	96.7	98.4	100.9	97.1	3.8	-1.7	1	2	133.3	129.6
PR750	Li Zhou Yang		6	China	2	9.01	11					#DIV/0!								12					#DIV/0!	#DIV/0!							12
PR752	Pei Wu		6	China	1	19.06	11					#DIV/0!								12					#DIV/0!	#DIV/0!							12
																									#DIV/0!	#DIV/0!
																									#DIV/0!	#DIV/0!
																									#DIV/0!	#DIV/0!
																									#DIV/0!	#DIV/0!
																									#DIV/0!	#DIV/0!
																									#DIV/0!	#DIV/0!
																									#DIV/0!	#DIV/0!
																									#DIV/0!	#DIV/0!
																									#DIV/0!	#DIV/0!
																									#DIV/0!	#DIV/0!
																									#DIV/0!	#DIV/0!
																									#DIV/0!	#DIV/0!
																									#DIV/0!	#DIV/0!
1	Españoles																								#DIV/0!	#DIV/0!
2	Sudamerica																								#DIV/0!	#DIV/0!
3	Europa del Este: Rumania, Ucrania, Bulgaria, Bosnia																								#DIV/0!	#DIV/0!
4	Marruecos																								#DIV/0!	#DIV/0!
5	Africa (negra)																								#DIV/0!	#DIV/0!
6	China																								#DIV/0!	#DIV/0!
																									#DIV/0!	#DIV/0!
																									#DIV/0!	#DIV/0!
																									#DIV/0!	#DIV/0!
																									#DIV/0!	#DIV/0!
																									#DIV/0!	#DIV/0!
																									#DIV/0!	#DIV/0!
																									#DIV/0!	#DIV/0!
																									#DIV/0!	#DIV/0!
																									#DIV/0!	#DIV/0!
																									#DIV/0!	#DIV/0!
																									#DIV/0!	#DIV/0!
																									#DIV/0!	#DIV/0!
																									#DIV/0!	#DIV/0!
																									#DIV/0!	#DIV/0!
																									#DIV/0!	#DIV/0!
																									#DIV/0!	#DIV/0!
																									#DIV/0!	#DIV/0!
																									#DIV/0!	#DIV/0!
																									#DIV/0!	#DIV/0!
																									#DIV/0!	#DIV/0!
																									#DIV/0!	#DIV/0!
																									#DIV/0!	#DIV/0!
																									#DIV/0!	#DIV/0!
																									#DIV/0!	#DIV/0!
																									#DIV/0!	#DIV/0!
																									#DIV/0!	#DIV/0!
																									#DIV/0!	#DIV/0!
																									#DIV/0!	#DIV/0!
																									#DIV/0!	#DIV/0!
																									#DIV/0!	#DIV/0!
																									#DIV/0!	#DIV/0!
																									#DIV/0!	#DIV/0!
																									#DIV/0!	#DIV/0!
																									#DIV/0!	#DIV/0!
																									#DIV/0!	#DIV/0!
																									#DIV/0!	#DIV/0!
																									#DIV/0!	#DIV/0!
																									#DIV/0!	#DIV/0!
																									#DIV/0!	#DIV/0!
																									#DIV/0!	#DIV/0!
																									#DIV/0!	#DIV/0!
																									#DIV/0!	#DIV/0!
																									#DIV/0!	#DIV/0!
																									#DIV/0!	#DIV/0!
																									#DIV/0!	#DIV/0!
																									#DIV/0!	#DIV/0!
																									#DIV/0!	#DIV/0!
																									#DIV/0!	#DIV/0!
																									#DIV/0!	#DIV/0!
																									#DIV/0!	#DIV/0!
																									#DIV/0!	#DIV/0!
																									#DIV/0!	#DIV/0!
																									#DIV/0!	#DIV/0!
																									#DIV/0!	#DIV/0!
																									#DIV/0!	#DIV/0!
																									#DIV/0!	#DIV/0!
																									#DIV/0!	#DIV/0!
																									#DIV/0!	#DIV/0!
																									#DIV/0!	#DIV/0!
																									#DIV/0!	#DIV/0!
																									#DIV/0!	#DIV/0!
																									#DIV/0!	#DIV/0!
																									#DIV/0!	#DIV/0!
																									#DIV/0!	#DIV/0!
																									#DIV/0!	#DIV/0!
																									#DIV/0!	#DIV/0!
																									#DIV/0!	#DIV/0!
																									#DIV/0!	#DIV/0!
																									#DIV/0!	#DIV/0!
																									#DIV/0!	#DIV/0!
																									#DIV/0!	#DIV/0!
																									#DIV/0!	#DIV/0!
																									#DIV/0!	#DIV/0!
																									#DIV/0!	#DIV/0!
																									#DIV/0!	#DIV/0!
																									#DIV/0!	#DIV/0!
																									#DIV/0!	#DIV/0!
																									#DIV/0!	#DIV/0!
																									#DIV/0!	#DIV/0!
																									#DIV/0!	#DIV/0!
																									#DIV/0!	#DIV/0!
																									#DIV/0!	#DIV/0!
																									#DIV/0!	#DIV/0!
																									#DIV/0!	#DIV/0!
																									#DIV/0!	#DIV/0!
																									#DIV/0!	#DIV/0!
																									#DIV/0!	#DIV/0!
																									#DIV/0!	#DIV/0!
																									#DIV/0!	#DIV/0!
																									#DIV/0!	#DIV/0!
																									#DIV/0!	#DIV/0!
																									#DIV/0!	#DIV/0!
																									#DIV/0!	#DIV/0!
																									#DIV/0!	#DIV/0!
																									#DIV/0!	#DIV/0!
																									#DIV/0!	#DIV/0!
																									#DIV/0!	#DIV/0!
																									#DIV/0!	#DIV/0!
																									#DIV/0!	#DIV/0!
																									#DIV/0!	#DIV/0!
																									#DIV/0!	#DIV/0!
																									#DIV/0!	#DIV/0!
																									#DIV/0!	#DIV/0!
																									#DIV/0!	#DIV/0!
																									#DIV/0!	#DIV/0!
																									#DIV/0!	#DIV/0!
																									#DIV/0!	#DIV/0!
																									#DIV/0!	#DIV/0!
																									#DIV/0!	#DIV/0!
																									#DIV/0!	#DIV/0!
																									#DIV/0!	#DIV/0!
																									#DIV/0!	#DIV/0!
																									#DIV/0!	#DIV/0!
																									#DIV/0!	#DIV/0!
																									#DIV/0!	#DIV/0!
																									#DIV/0!	#DIV/0!
																				12					#DIV/0!	#DIV/0!
																				12					#DIV/0!	#DIV/0!
																				12					#DIV/0!	#DIV/0!
																				12					#DIV/0!	#DIV/0!
																				12					#DIV/0!	#DIV/0!
																				12					#DIV/0!	#DIV/0!
																				12					#DIV/0!	#DIV/0!
																				12					#DIV/0!	#DIV/0!
																				12					#DIV/0!	#DIV/0!
																				12					#DIV/0!	#DIV/0!
																				12					#DIV/0!	#DIV/0!
																				12					#DIV/0!	#DIV/0!
																				12					#DIV/0!	#DIV/0!
																				12					#DIV/0!	#DIV/0!
																				12					#DIV/0!	#DIV/0!
																				12					#DIV/0!	#DIV/0!
																				12					#DIV/0!	#DIV/0!
																				12					#DIV/0!	#DIV/0!
																				12					#DIV/0!	#DIV/0!
																				12					#DIV/0!	#DIV/0!
																				12					#DIV/0!	#DIV/0!
																				12					#DIV/0!	#DIV/0!
																				12					#DIV/0!	#DIV/0!
																				12					#DIV/0!	#DIV/0!
																				12					#DIV/0!	#DIV/0!
																				12					#DIV/0!	#DIV/0!
																				12					#DIV/0!	#DIV/0!
																				12					#DIV/0!	#DIV/0!
																				12					#DIV/0!	#DIV/0!
																				12					#DIV/0!	#DIV/0!
																				12					#DIV/0!	#DIV/0!
																				12					#DIV/0!	#DIV/0!
																				12					#DIV/0!	#DIV/0!
																				12					#DIV/0!	#DIV/0!
																				12					#DIV/0!	#DIV/0!
																				12					#DIV/0!	#DIV/0!
																				12					#DIV/0!	#DIV/0!
																				12					#DIV/0!	#DIV/0!
																				12					#DIV/0!	#DIV/0!
																				12					#DIV/0!	#DIV/0!
																				12					#DIV/0!	#DIV/0!
																				12					#DIV/0!	#DIV/0!
																				12					#DIV/0!	#DIV/0!
																				12					#DIV/0!	#DIV/0!
																				12					#DIV/0!	#DIV/0!
																				12					#DIV/0!	#DIV/0!
																				12					#DIV/0!	#DIV/0!
																				12					#DIV/0!	#DIV/0!
																				12					#DIV/0!	#DIV/0!
																				12					#DIV/0!	#DIV/0!
																				12					#DIV/0!	#DIV/0!
																				12					#DIV/0!	#DIV/0!
																				12					#DIV/0!	#DIV/0!
																				12					#DIV/0!	#DIV/0!
																				12					#DIV/0!	#DIV/0!
																				12					#DIV/0!	#DIV/0!
																				12					#DIV/0!	#DIV/0!
																				12					#DIV/0!	#DIV/0!
																				12					#DIV/0!	#DIV/0!
																				12					#DIV/0!	#DIV/0!
																				12					#DIV/0!	#DIV/0!
																				12					#DIV/0!	#DIV/0!
																				12					#DIV/0!	#DIV/0!
																				12					#DIV/0!	#DIV/0!
																				12					#DIV/0!	#DIV/0!
																				12					#DIV/0!	#DIV/0!
																				12					#DIV/0!	#DIV/0!
																				12					#DIV/0!	#DIV/0!
																				12					#DIV/0!	#DIV/0!
																				12					#DIV/0!	#DIV/0!
																				12					#DIV/0!	#DIV/0!
																				12					#DIV/0!	#DIV/0!
																				12					#DIV/0!	#DIV/0!
																				12					#DIV/0!	#DIV/0!
																				12					#DIV/0!	#DIV/0!
																				12					#DIV/0!	#DIV/0!
																				12					#DIV/0!	#DIV/0!
																				12					#DIV/0!	#DIV/0!
																				12					#DIV/0!	#DIV/0!
																				12					#DIV/0!	#DIV/0!
																				12					#DIV/0!	#DIV/0!
																				12					#DIV/0!	#DIV/0!
																				12					#DIV/0!	#DIV/0!
																				12					#DIV/0!	#DIV/0!
																				12					#DIV/0!	#DIV/0!
																				12					#DIV/0!	#DIV/0!
																				12					#DIV/0!	#DIV/0!
																				12					#DIV/0!	#DIV/0!
																				12					#DIV/0!	#DIV/0!
																				12					#DIV/0!	#DIV/0!
																				12					#DIV/0!	#DIV/0!
																				12					#DIV/0!	#DIV/0!
																				12					#DIV/0!	#DIV/0!
																				12					#DIV/0!	#DIV/0!
																				12					#DIV/0!	#DIV/0!
																				12					#DIV/0!	#DIV/0!
																				12					#DIV/0!	#DIV/0!
																				12					#DIV/0!	#DIV/0!
																				12					#DIV/0!	#DIV/0!
																				12					#DIV/0!	#DIV/0!
																				12					#DIV/0!	#DIV/0!
																				12					#DIV/0!	#DIV/0!
																				12					#DIV/0!	#DIV/0!
																				12					#DIV/0!	#DIV/0!
																				12					#DIV/0!	#DIV/0!
																				12					#DIV/0!	#DIV/0!
																				12					#DIV/0!	#DIV/0!
																				12					#DIV/0!	#DIV/0!
																				12					#DIV/0!	#DIV/0!
																				12					#DIV/0!	#DIV/0!
																				12					#DIV/0!	#DIV/0!
																				12					#DIV/0!	#DIV/0!
																				12					#DIV/0!	#DIV/0!
																				12					#DIV/0!	#DIV/0!
																				12					#DIV/0!	#DIV/0!
																				12					#DIV/0!	#DIV/0!
																				12					#DIV/0!	#DIV/0!
																				12					#DIV/0!	#DIV/0!
																				12					#DIV/0!	#DIV/0!
																				12					#DIV/0!	#DIV/0!
																				12					#DIV/0!	#DIV/0!
																				12					#DIV/0!	#DIV/0!
																				12					#DIV/0!	#DIV/0!
																				12					#DIV/0!	#DIV/0!
																				12					#DIV/0!	#DIV/0!
																				12					#DIV/0!	#DIV/0!
																				12					#DIV/0!	#DIV/0!
																				12					#DIV/0!	#DIV/0!
																				12					#DIV/0!	#DIV/0!
																				12					#DIV/0!	#DIV/0!
																				12					#DIV/0!	#DIV/0!
																				12					#DIV/0!	#DIV/0!
																				12					#DIV/0!	#DIV/0!
																				12					#DIV/0!	#DIV/0!
																				12					#DIV/0!	#DIV/0!
																				12					#DIV/0!	#DIV/0!
																				12					#DIV/0!	#DIV/0!
																				12					#DIV/0!	#DIV/0!
																				12					#DIV/0!	#DIV/0!
																				12					#DIV/0!	#DIV/0!
																				12					#DIV/0!	#DIV/0!
																				12					#DIV/0!	#DIV/0!
																				12					#DIV/0!	#DIV/0!
																				12					#DIV/0!	#DIV/0!
																				12					#DIV/0!	#DIV/0!
																				12					#DIV/0!	#DIV/0!
																				12					#DIV/0!	#DIV/0!
																				12					#DIV/0!	#DIV/0!
																				12					#DIV/0!	#DIV/0!
																				12					#DIV/0!	#DIV/0!
																				12					#DIV/0!	#DIV/0!
																				12					#DIV/0!	#DIV/0!
																				12					#DIV/0!	#DIV/0!
																				12					#DIV/0!	#DIV/0!
																				12					#DIV/0!	#DIV/0!
																				12					#DIV/0!	#DIV/0!
																				12					#DIV/0!	#DIV/0!
																				12					#DIV/0!	#DIV/0!
																				12					#DIV/0!	#DIV/0!
																				12					#DIV/0!	#DIV/0!
																				12					#DIV/0!	#DIV/0!
																				12					#DIV/0!	#DIV/0!
																				12					#DIV/0!	#DIV/0!
																				12					#DIV/0!	#DIV/0!
																				12					#DIV/0!	#DIV/0!
																				12					#DIV/0!	#DIV/0!
																				12					#DIV/0!	#DIV/0!
																				12					#DIV/0!	#DIV/0!
																				12					#DIV/0!	#DIV/0!
																				12					#DIV/0!	#DIV/0!
																				12					#DIV/0!	#DIV/0!
	INDICE
	1: CAUCASICO
	2: LATINOAMERICA
	3: RUMANIA, UCRANIA, BULGARIA
	4: MARRUECOS
	5:NEGRA. AFRICA
	6: CHINA
[truncated: 52 more columns]

## Sheet: Supp 1
Supporting information File 1: Eligibility criteria for inclusion/exclusion from the study research and diagnostic-clinical data recorded for each patient.
ELEGIBILITY CRITERIA	DATA RECORDED
Inclusion/exclusion criteria	Diagnostic data recorded	Clinical data recorded	Radiographic data recorded
Complete orthodontic treatment with fixed appliances	Age [years]	Treatment time [months]	Mean EARR (±SD) [mm]
Complete root formation	Sex [female, male]	Treatment type [extraction, non-extraction]	Malgrem score [0,1,2,3,4]
No previus history of dental trauma	Ethnic origin [Caucasian, East European or Latin American]	Bracket slot type [0.018, 0.022]	Crown/root ratio
No systematic pathologies altering hard tissue biology	Dental Malocclusion [I,II/1, II/2, III]	Treatment phases [1,2]	Apex morphology 1.2, 1,1 [curved, rounded, pointed, square]
No root canal treatment therapy on measured teeth	Asthma medication [yes, no]	Maxillary expansion [yes, no]	Crown lenght 1.2, 1.1 (T0, T1)
No orthodontic retreatment	Onychophagy [yes, no]	Adequate arc sequence [yes, no]	Root lenght 1.2, 1.1 (T0, T1)
No impacted canines proximate to incisors		Intraoral class Elastics [yes, no]	Total lenght 1.2, 1.1 (T0, T1)
Available panoramic pre and post-treatment radiographs		Intraoral anterior Elastics [yes, no]	Skeletal Malocclusion [I,II, III]
Caucasian, East European or Latin American ethnia		Vertical forces applied [intrusion, extrusion, none]
		Torque applied [yes, no]
		ABO Discrepancy Index⁺ [score]
⁺Discrepancy Index ABO (from Cangialosi TJ, et al. The ABO discrepancy index: a measure of case complexity. Am J Orthod Dentofacial Orthop. 2004;125:270-278) ;
